# Supplementary material for: Integration of Distributed Streamflow Measurement Metadata for Improved Water Resource Decision-Making
Source: MDPI journal article supplement (doi:10.3390/w15040679), 2023-02-09
Supplement: s1 [file s1]

Archive with 1 entries (1 files):
- water-2150353-supplementary.pdf
