# Supplementary material for: Integration of Distributed Streamflow Measurement Metadata for Improved Water Resource Decision-Making
Source: MDPI journal article supplement (doi:10.3390/w15040679), 2023-02-09
Supplement: s1 [file s1 › water-2150353-supplementary.pdf]

**Supplemental Table S1:** Metadata template information of importance as identified by stakeholder advisory group

| Metadata               | Potential Controlled Vocabulary                                    | Automated | Notes |
|------------------------|--------------------------------------------------------------------|-----------|-------|
| Organization           |                                                                    |           |       |
| Organization_dataset   |                                                                    |           |       |
| Org_siteNo             |                                                                    |           |       |
| Site_Name              |                                                                    |           |       |
| Latitude               |                                                                    |           |       |
| Longitude              |                                                                    |           |       |
| Start_date             |                                                                    |           |       |
| End_date               |                                                                    |           |       |
| Period_of_record_yrs   |                                                                    | Yes       |       |
| Period_of_record_days  |                                                                    | Yes       |       |
| Status                 | active, inactive                                                   |           |       |
| Interval               | Instant, 15 minutes, 30 minutes, hourly, weekly, monthly, annually |           |       |
| Meas.freq              | continuous, discrete                                               |           |       |
| Format                 | Electronic, paper                                                  |           |       |
| Stream type            | stream, canal                                                      |           |       |
| Availability           | Public, private, upon request                                      |           |       |
| Method                 | Stage, discharge, rated discharge                                  |           |       |
| Units                  |                                                                    |           |       |
| Instrumentation        |                                                                    |           |       |
| accuracy categorical   | <.02ft, .02-.05ft, .05-.1 ft, >.1ft                                |           |       |
| Purpose                | Operations, research                                               |           |       |
| download frequency     | Weekly, monthly, telemetry                                         |           |       |
| Rating_curve_available | Online, yes local, no                                              |           |       |
| Ratin_curve_updated    | Annually, bi-annually                                              |           |       |

|                   |                 |             |                                                                            |
|-------------------|-----------------|-------------|----------------------------------------------------------------------------|
| Auxiliary data    |                 |             |                                                                            |
| url               |                 |             |                                                                            |
| State             | Full state name | Yes         |                                                                            |
| County            |                 | Yes         |                                                                            |
| HUC8              |                 | Yes         |                                                                            |
| nhdpv2_REACHCODE  |                 | Potentially | Snapping locations to the NHD is a tedious process and depends on accuracy |
| Location accuracy |                 |             |                                                                            |
| Contact_email     |                 |             |                                                                            |
| Data_notes        |                 |             |                                                                            |

**Supplemental Table S2:** List of organizations with data in the streamflow catalog and data portals where available.

| State | Organization                        | Organization Acronym | Organization Website                                                  | Division/ Program                          | Program Website                                                                           | Data Portal                                                                                                                               |
|-------|-------------------------------------|----------------------|-----------------------------------------------------------------------|--------------------------------------------|-------------------------------------------------------------------------------------------|-------------------------------------------------------------------------------------------------------------------------------------------|
| ID    | Idaho Department of Water Resources | IDWR                 | <a href="https://idwr.idaho.gov/">https://idwr.idaho.gov/</a>         | ESPA program, Upper Salmon Basin Watershed | <a href="https://modelwatershed.idaho.gov/">https://modelwatershed.idaho.gov/</a>         | <a href="https://water-measurement-idwr.hub.arcgis.com/pages/locations">https://water-measurement-idwr.hub.arcgis.com/pages/locations</a> |
| ID    | Idaho Power                         |                      | <a href="https://www.idahopower.com/">https://www.idahopower.com/</a> | Water Information                          | <a href="https://www.idahopower.com/community-">https://www.idahopower.com/community-</a> | <a href="https://www.idahopower.com/community-">https://www.idahopower.com/community-</a>                                                 |

|    |                                                    |        |                                                                                                                                                                                                                                    |                                                 |                                                                                                                                                                                                                                                                                                                                    |                                                                                                                                                                                                                                                                                                                     |
|----|----------------------------------------------------|--------|------------------------------------------------------------------------------------------------------------------------------------------------------------------------------------------------------------------------------------|-------------------------------------------------|------------------------------------------------------------------------------------------------------------------------------------------------------------------------------------------------------------------------------------------------------------------------------------------------------------------------------------|---------------------------------------------------------------------------------------------------------------------------------------------------------------------------------------------------------------------------------------------------------------------------------------------------------------------|
|    |                                                    |        |                                                                                                                                                                                                                                    |                                                 | recreation/recreation/<br>water-information/                                                                                                                                                                                                                                                                                       | recreation/recreation/water-<br>information/stream-flow-data/                                                                                                                                                                                                                                                       |
| ID | Dry Creek<br>Experimental<br>Watershed             | DCEW   | <a href="https://www.boisestate.edu/drycreek/">https://www.<br/>boisestate.edu<br/>/drycreek/</a>                                                                                                                                  |                                                 |                                                                                                                                                                                                                                                                                                                                    | <a href="https://www.boisestate.edu/drycreek/dry-creek-data/">https://www.boisestate.edu/drycr<br/>eek/dry-creek-data/</a>                                                                                                                                                                                          |
| ID | Idaho<br>Department of<br>Environmental<br>Quality | ID DEQ | <a href="https://www.deq.idaho.gov">https://www.<br/>deq.idaho.gov</a>                                                                                                                                                             | Water                                           | <a href="https://www.deq.idaho.gov/water-quality/">https://www.deq.idah<br/>o.gov/water-quality/</a>                                                                                                                                                                                                                               | <a href="https://mapcase.deq.idaho.gov/wq2022/">https://mapcase.deq.idaho.gov/wq<br/>2022/</a>                                                                                                                                                                                                                      |
| ID | Northwest<br>Watershed<br>Research<br>Center       | NWRC   | <a href="https://www.ars.usda.gov/pacific-west-area/boise-id/northwest-watershed-research-center/">https://www.a<br/>rs.usda.gov/p<br/>acific-west-<br/>area/boise-<br/>id/northwest-<br/>watershed-<br/>research-<br/>center/</a> | Reynolds<br>Creek<br>Experimenta<br>l Watershed | <a href="https://www.ars.usda.gov/pacific-west-area/boise-id/northwest-watershed-research-center/docs/reynolds-creek-experimental-watershed-data/">https://www.ars.usda.<br/>gov/pacific-west-<br/>area/boise-<br/>id/northwest-<br/>watershed-research-<br/>center/docs/reynolds-<br/>creek-experimental-<br/>watershed-data/</a> | <a href="https://www.ars.usda.gov/pacific-west-area/boise-id/northwest-watershed-research-center/docs/reynolds-creek-experimental-watershed-data/">https://www.ars.usda.gov/pacific-<br/>west-area/boise-id/northwest-<br/>watershed-research-<br/>center/docs/reynolds-creek-<br/>experimental-watershed-data/</a> |
| ID | Pioneer<br>Irrigation<br>District                  |        | <a href="http://www.pioneerirrigation.com/">http://www.pioneerirrigati<br/>on.com/</a>                                                                                                                                             |                                                 |                                                                                                                                                                                                                                                                                                                                    |                                                                                                                                                                                                                                                                                                                     |

|                  |                                                 |      |                                                                                           |                         |                                                                                                                                                                                                           |                                                                                                                                     |
|------------------|-------------------------------------------------|------|-------------------------------------------------------------------------------------------|-------------------------|-----------------------------------------------------------------------------------------------------------------------------------------------------------------------------------------------------------|-------------------------------------------------------------------------------------------------------------------------------------|
| ID               | Priest River<br>Experimental<br>Forest          | USFS |                                                                                           |                         | <a href="https://www.fs.usda.gov/rmrs/experimental-forests-and-ranges/priest-river-experimental-forest">https://www.fs.usda.gov/rmrs/experimental-forests-and-ranges/priest-river-experimental-forest</a> | <a href="https://www.fs.usda.gov/rds/archive/">https://www.fs.usda.gov/rds/archive/</a>                                             |
| ID               | Mica Creek<br>Experimental<br>Watershed         | MCEW | <a href="https://www.uidaho.edu/cnr/mica-creek">https://www.uidaho.edu/cnr/mica-creek</a> |                         |                                                                                                                                                                                                           |                                                                                                                                     |
| ID               | SPF Water<br>Engineering                        | SPF  | <a href="http://spfwater.com/">http://spfwater.com/</a>                                   |                         |                                                                                                                                                                                                           |                                                                                                                                     |
| ID               | Ecosystem<br>Sciences                           |      | <a href="http://www.ecosystemsciences.com/">http://www.ecosystemsciences.com/</a>         |                         |                                                                                                                                                                                                           |                                                                                                                                     |
| ID,<br>UT,<br>WY | Bear River<br>Watershed                         |      |                                                                                           | Bear River<br>Watershed | <a href="https://bearriverinfo.org/index">https://bearriverinfo.org/index</a>                                                                                                                             | <a href="https://bearriverinfo.org/watershed-data/index">https://bearriverinfo.org/watershed-data/index</a>                         |
| OR               | Oregon<br>Department of<br>Fish and<br>Wildlife | ODFW | <a href="https://www.dfw.state.or.us/">https://www.dfw.state.or.us/</a>                   |                         |                                                                                                                                                                                                           |                                                                                                                                     |
| OR               | Oregon Water<br>Resources<br>Department         | OWRD | <a href="https://www.oregon.gov/o">https://www.oregon.gov/o</a>                           |                         |                                                                                                                                                                                                           | <a href="https://apps.wrd.state.or.us/apps/sw/hydro_near_real_time/">https://apps.wrd.state.or.us/apps/sw/hydro_near_real_time/</a> |

|    |                                               |                 |                                                                                                             |                                        |                                                                   |                                                                                                                                                                           |
|----|-----------------------------------------------|-----------------|-------------------------------------------------------------------------------------------------------------|----------------------------------------|-------------------------------------------------------------------|---------------------------------------------------------------------------------------------------------------------------------------------------------------------------|
|    |                                               |                 | wrd/pages/index.aspx                                                                                        |                                        |                                                                   |                                                                                                                                                                           |
| OR | City of Salem                                 | City of Salem   | <a href="https://www.cityofsalem.net/">https://www.cityofsalem.net/</a>                                     | Mid-Willamette Valley High Water Watch | <a href="https://hwww.onerain.com/">https://hwww.onerain.com/</a> | <a href="https://hwww.onerain.com/list/">https://hwww.onerain.com/list/</a>                                                                                               |
| OR | HJ Andrews Long Term Ecological Research Site | HJ Andrews LTER | <a href="https://andrewsforest.oregonstate.edu/">https://andrewsforest.oregonstate.edu/</a>                 |                                        |                                                                   | <a href="https://portal.edirepository.org/nis/mapbrowse?packageid=knb-lter-and.4341.33">https://portal.edirepository.org/nis/mapbrowse?packageid=knb-lter-and.4341.33</a> |
| OR | Trask River Watershed Study                   |                 | <a href="https://traskstudy.forestry.oregonstate.edu/">https://traskstudy.forestry.oregonstate.edu/</a>     |                                        |                                                                   |                                                                                                                                                                           |
| OR | Oregon Water Enhancement Board                | OWEB            | <a href="https://www.oregon.gov/oweb/pages/index.aspx">https://www.oregon.gov/oweb/pages/index.aspx</a>     |                                        |                                                                   |                                                                                                                                                                           |
| OR | Deschutes River Conservancy                   |                 | <a href="https://www.deschutesriver.org/about-us/staff/">https://www.deschutesriver.org/about-us/staff/</a> | OWEB Grantee                           |                                                                   |                                                                                                                                                                           |
| OR | Walla Walla Basin                             | WWBWC           | <a href="https://www.wwbwc.org/">https://www.wwbwc.org/</a>                                                 | OWEB Grantee                           |                                                                   | <a href="https://www.wwbwc.org/monitoring/surfacewater.html">https://www.wwbwc.org/monitoring/surfacewater.html</a>                                                       |

|    |                                             |       |                                                                                     |              |  |  |
|----|---------------------------------------------|-------|-------------------------------------------------------------------------------------|--------------|--|--|
|    | Watershed Council                           |       |                                                                                     |              |  |  |
| OR | Warner Basin Habitat Partnership            | WBAHP |                                                                                     | OWEB Grantee |  |  |
| OR | Columbia Soil & Water Conservation District |       | <a href="https://www.columbiaswcd.com/">https://www.columbiaswcd.com/</a>           | OWEB Grantee |  |  |
| OR | Coos Watershed Association                  |       | <a href="https://cooswatershed.org/">https://cooswatershed.org/</a>                 | OWEB Grantee |  |  |
| OR | Malheur Watershed Council                   |       | <a href="https://www.malheurwatershed.com/">https://www.malheurwatershed.com/</a>   | OWEB Grantee |  |  |
| OR | North Fork John Day Watershed Council       |       | <a href="https://www.nfjdwcd.org/">https://www.nfjdwcd.org/</a>                     | OWEB Grantee |  |  |
| OR | Umatilla County SWCD                        |       | <a href="http://www.umatillacountyswcd.com/">http://www.umatillacountyswcd.com/</a> | OWEB Grantee |  |  |

|     |                                  |         |                                                                                   |                 |                                                                                                                                                                                                                     |                                                                                                                 |
|-----|----------------------------------|---------|-----------------------------------------------------------------------------------|-----------------|---------------------------------------------------------------------------------------------------------------------------------------------------------------------------------------------------------------------|-----------------------------------------------------------------------------------------------------------------|
| OR  | Lincoln SWCD and partners        |         | <a href="http://www.lincolnswcd.org/">http://www.lincolnswcd.org/</a>             | OWEB Grantee    |                                                                                                                                                                                                                     |                                                                                                                 |
| OR  | The Understory Initiative        |         | <a href="https://understoryinitiative.org/">https://understoryinitiative.org/</a> | OWEB Grantee    |                                                                                                                                                                                                                     |                                                                                                                 |
| PNW | PacifiCorp                       |         | <a href="https://www.pacificorp.com/">https://www.pacificorp.com/</a>             |                 | <a href="https://www.pacificorp.com/community/recreation/water-release.html">https://www.pacificorp.com/community/recreation/water-release.html</a>                                                                 |                                                                                                                 |
| PNW | US Forest Service, Region 6      | USFS R6 | <a href="https://www.fs.usda.gov/r6">https://www.fs.usda.gov/r6</a>               |                 |                                                                                                                                                                                                                     |                                                                                                                 |
| WA  | Washington Department of Ecology | ECY     | <a href="https://ecology.wa.gov/">https://ecology.wa.gov/</a>                     | Flow Monitoring | <a href="https://ecology.wa.gov/Research-Data/Monitoring-assessment/River-stream-monitoring/Flow-monitoring">https://ecology.wa.gov/Research-Data/Monitoring-assessment/River-stream-monitoring/Flow-monitoring</a> | <a href="https://apps.ecology.wa.gov/continuousflowandwq/">https://apps.ecology.wa.gov/continuousflowandwq/</a> |
| WA  | Washington Department of         | WDFW    | <a href="https://wdfw.wa.gov/">https://wdfw.wa.gov/</a>                           |                 |                                                                                                                                                                                                                     |                                                                                                                 |

|    |                      |  |                                                                               |  |  |                                                                                                                                     |
|----|----------------------|--|-------------------------------------------------------------------------------|--|--|-------------------------------------------------------------------------------------------------------------------------------------|
|    | Fish and<br>Wildlife |  |                                                                               |  |  |                                                                                                                                     |
| WA | Pierce County        |  | <a href="https://www.piercecountywa.gov/">https://www.piercecountywa.gov/</a> |  |  | <a href="https://www.piercecountywa.gov/7390/Environmental-Data-GIS">https://www.piercecountywa.gov/7390/Environmental-Data-GIS</a> |
